# Supplementary material
Source: PubMed Central journal article supplement (PMC6647946)
Supplement: ao9b00081_si_001.pdf [file ao9b00081_si_001.pdf]

## Supporting Information

# Decarbonylative Borylation of Amides by Palladium Catalysis

Shicheng Shi,<sup>†</sup> and Michal Szostak<sup>\*,†</sup>

<sup>†</sup>*Department of Chemistry, Rutgers University, 73 Warren St., Newark, NJ 07102, United States*

[michal.szostak@rutgers.edu](mailto:michal.szostak@rutgers.edu)

|                                                |    |
|------------------------------------------------|----|
| <b>Table of Contents</b>                       | S1 |
| <sup>1</sup> H and <sup>13</sup> C NMR Spectra | S2 |

### **Corresponding Author:**

Prof. Dr. M. Szostak

Department of Chemistry, Rutgers University

73 Warren Street, Newark, NJ 07102, United States

E-mail: michal.szostak@rutgers.edu

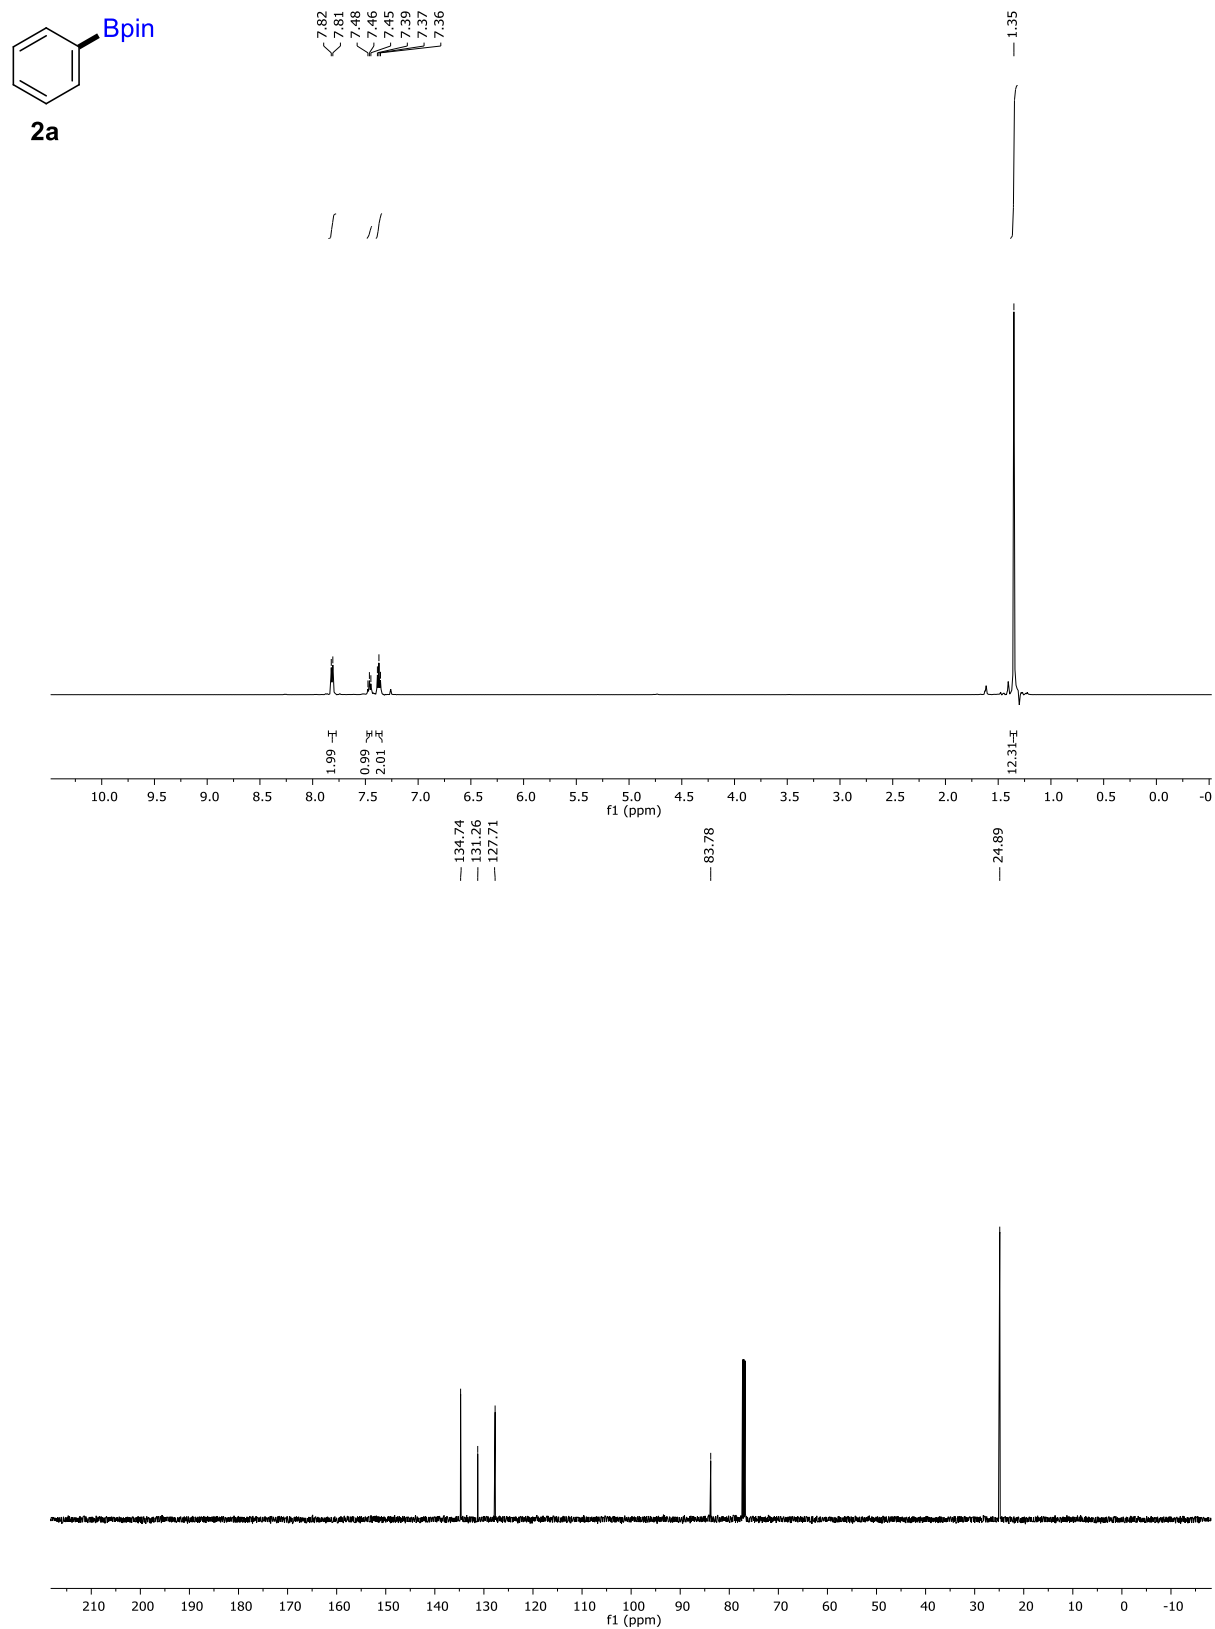**Figure S1.** <sup>1</sup>H NMR and <sup>13</sup>C NMR Spectra of **2a**.

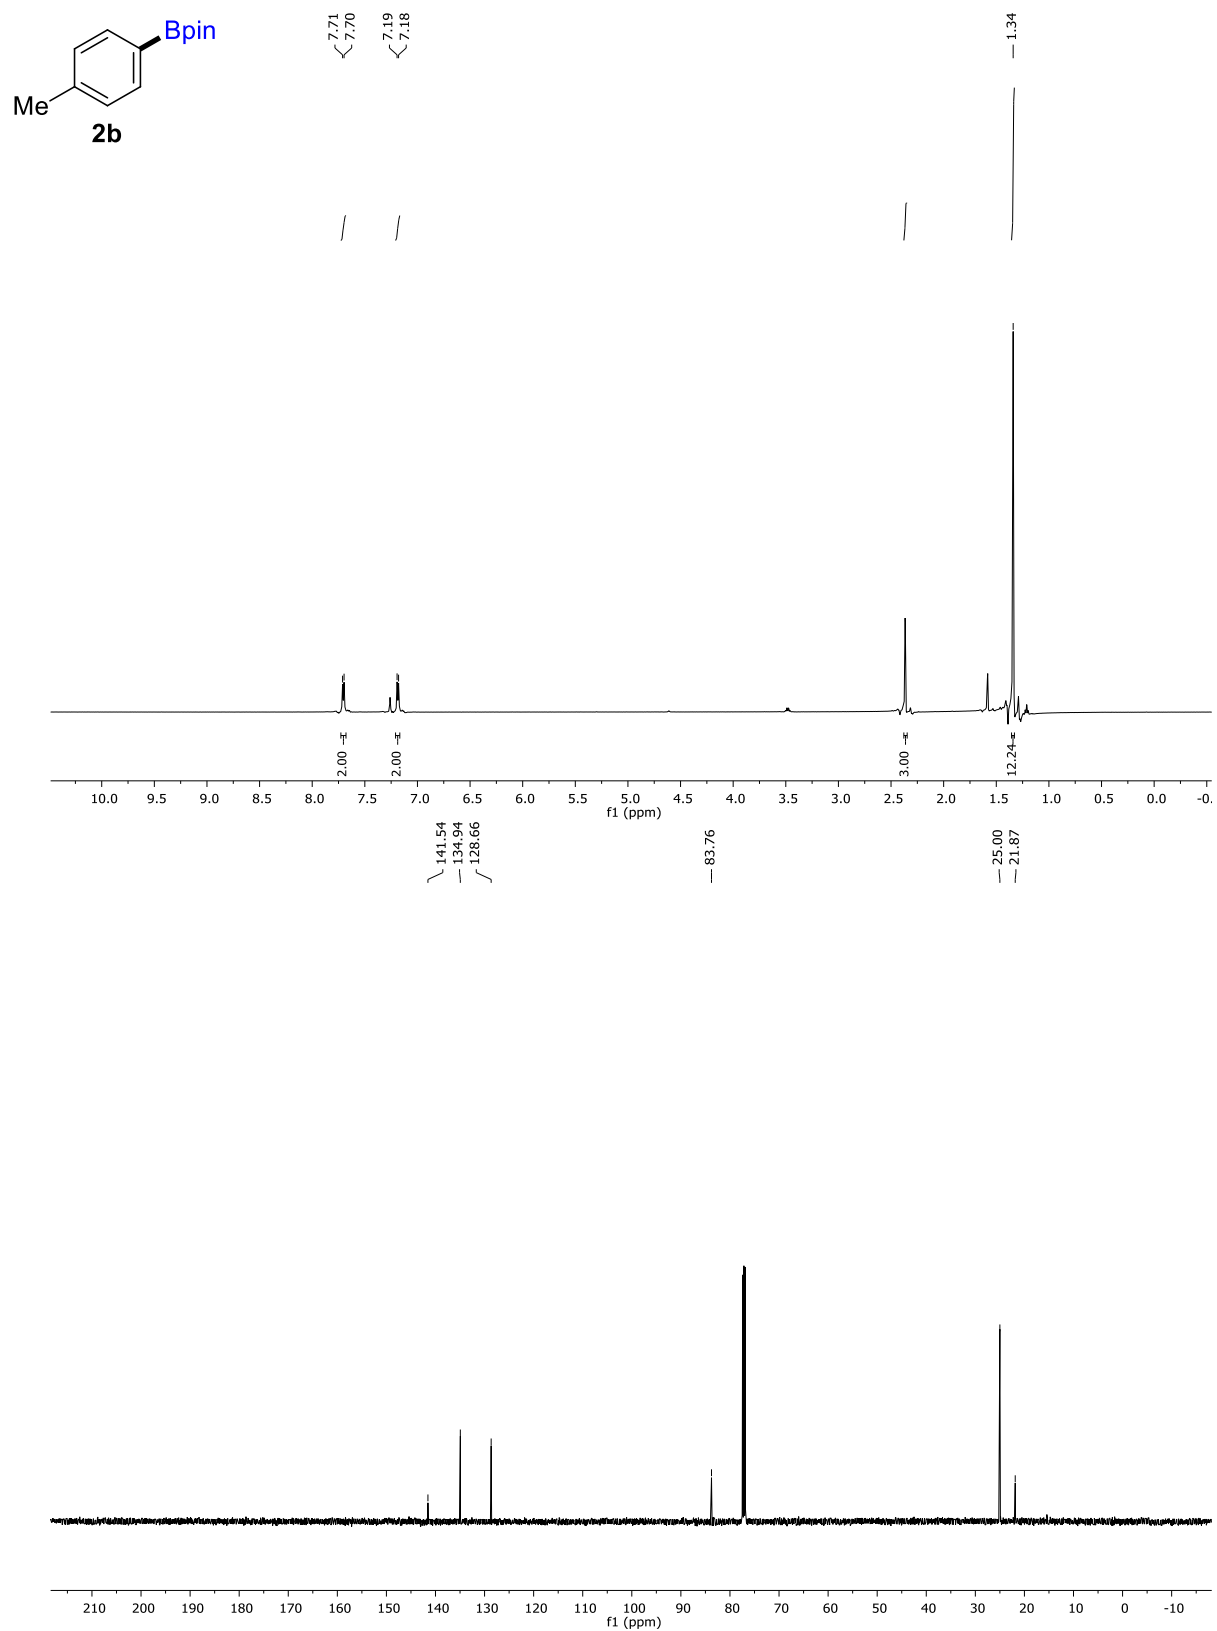**Figure S2.**  $^1\text{H}$  NMR and  $^{13}\text{C}$  NMR Spectra of **2b**.

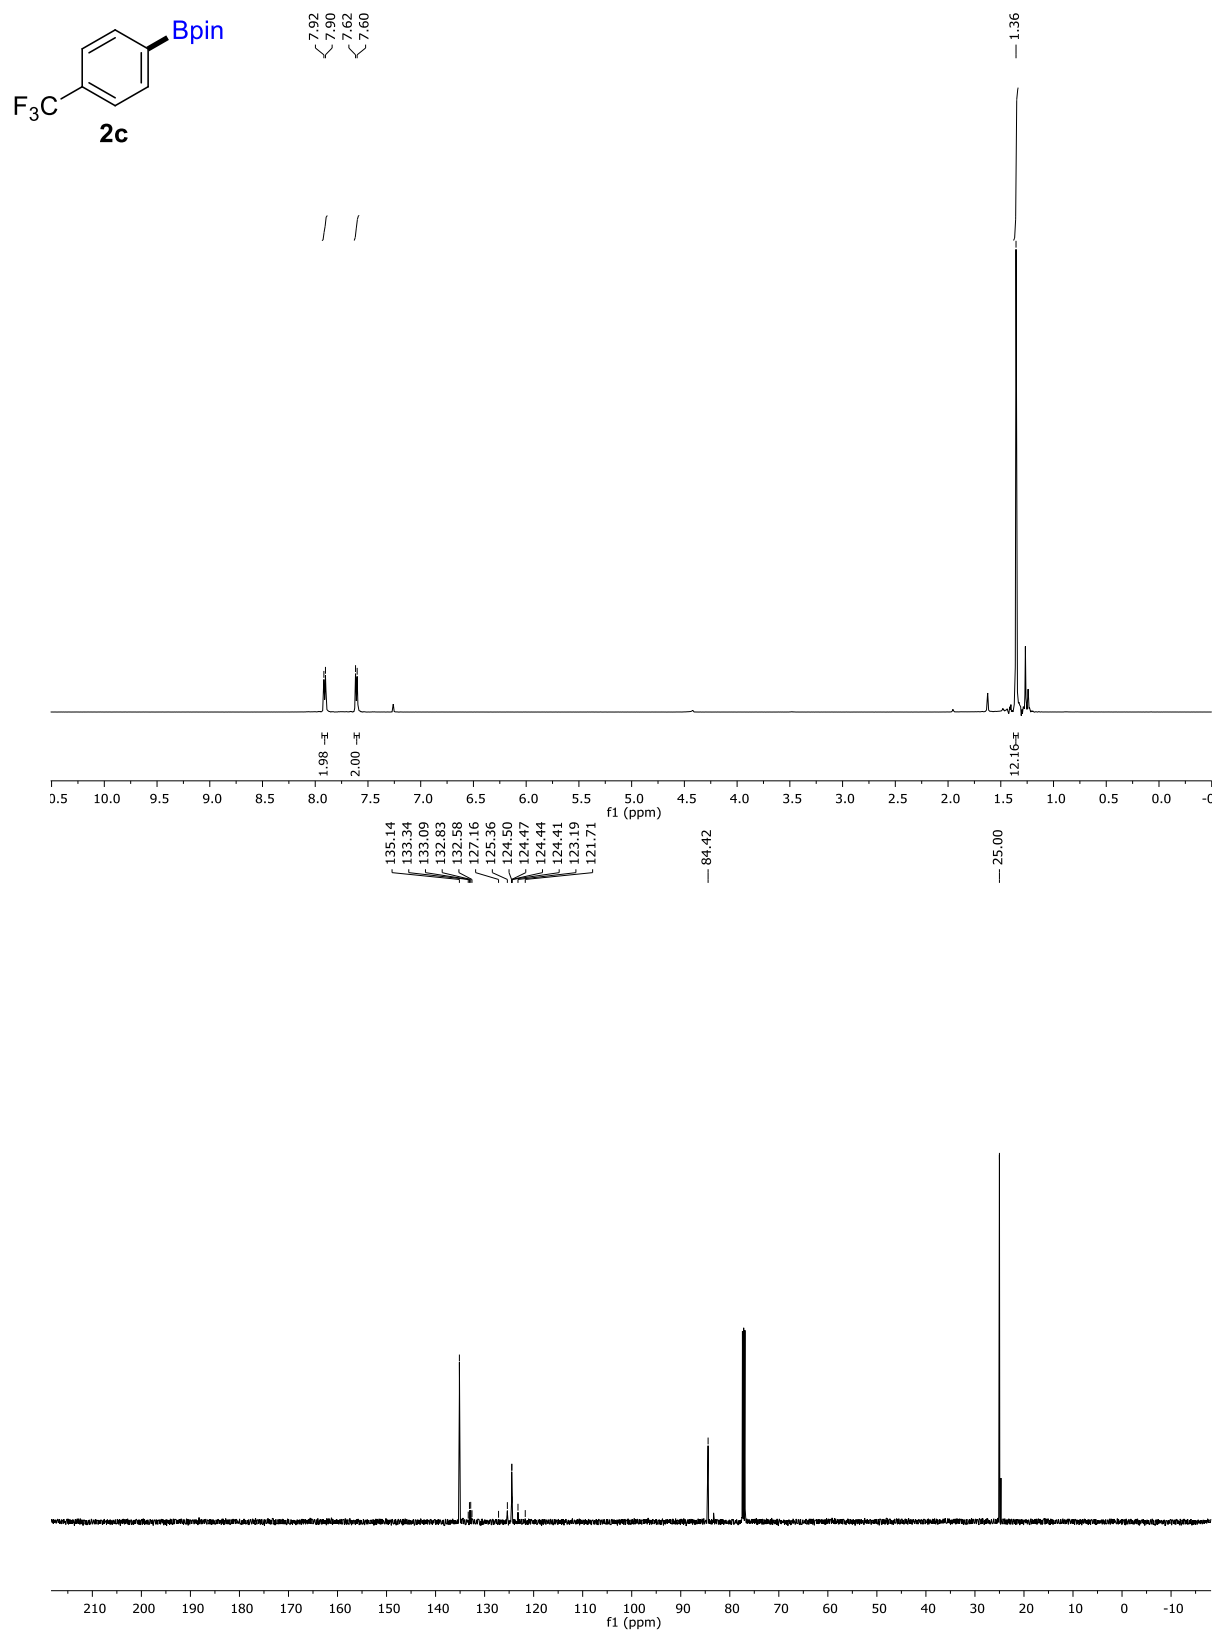

Figure S3.  $^1\text{H}$  NMR and  $^{13}\text{C}$  NMR Spectra of **2c**.

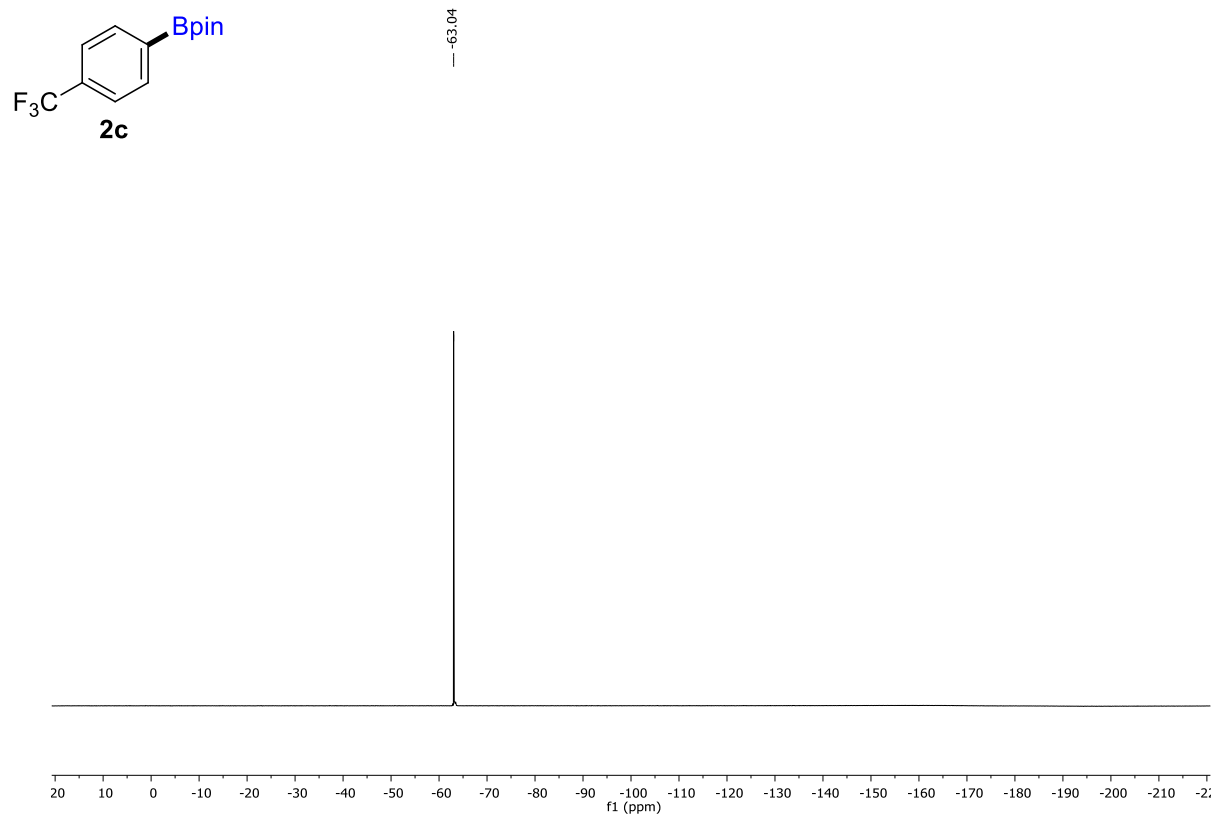

**Figure S4.**  $^{19}\text{F}$  NMR Spectrum of **2c**.

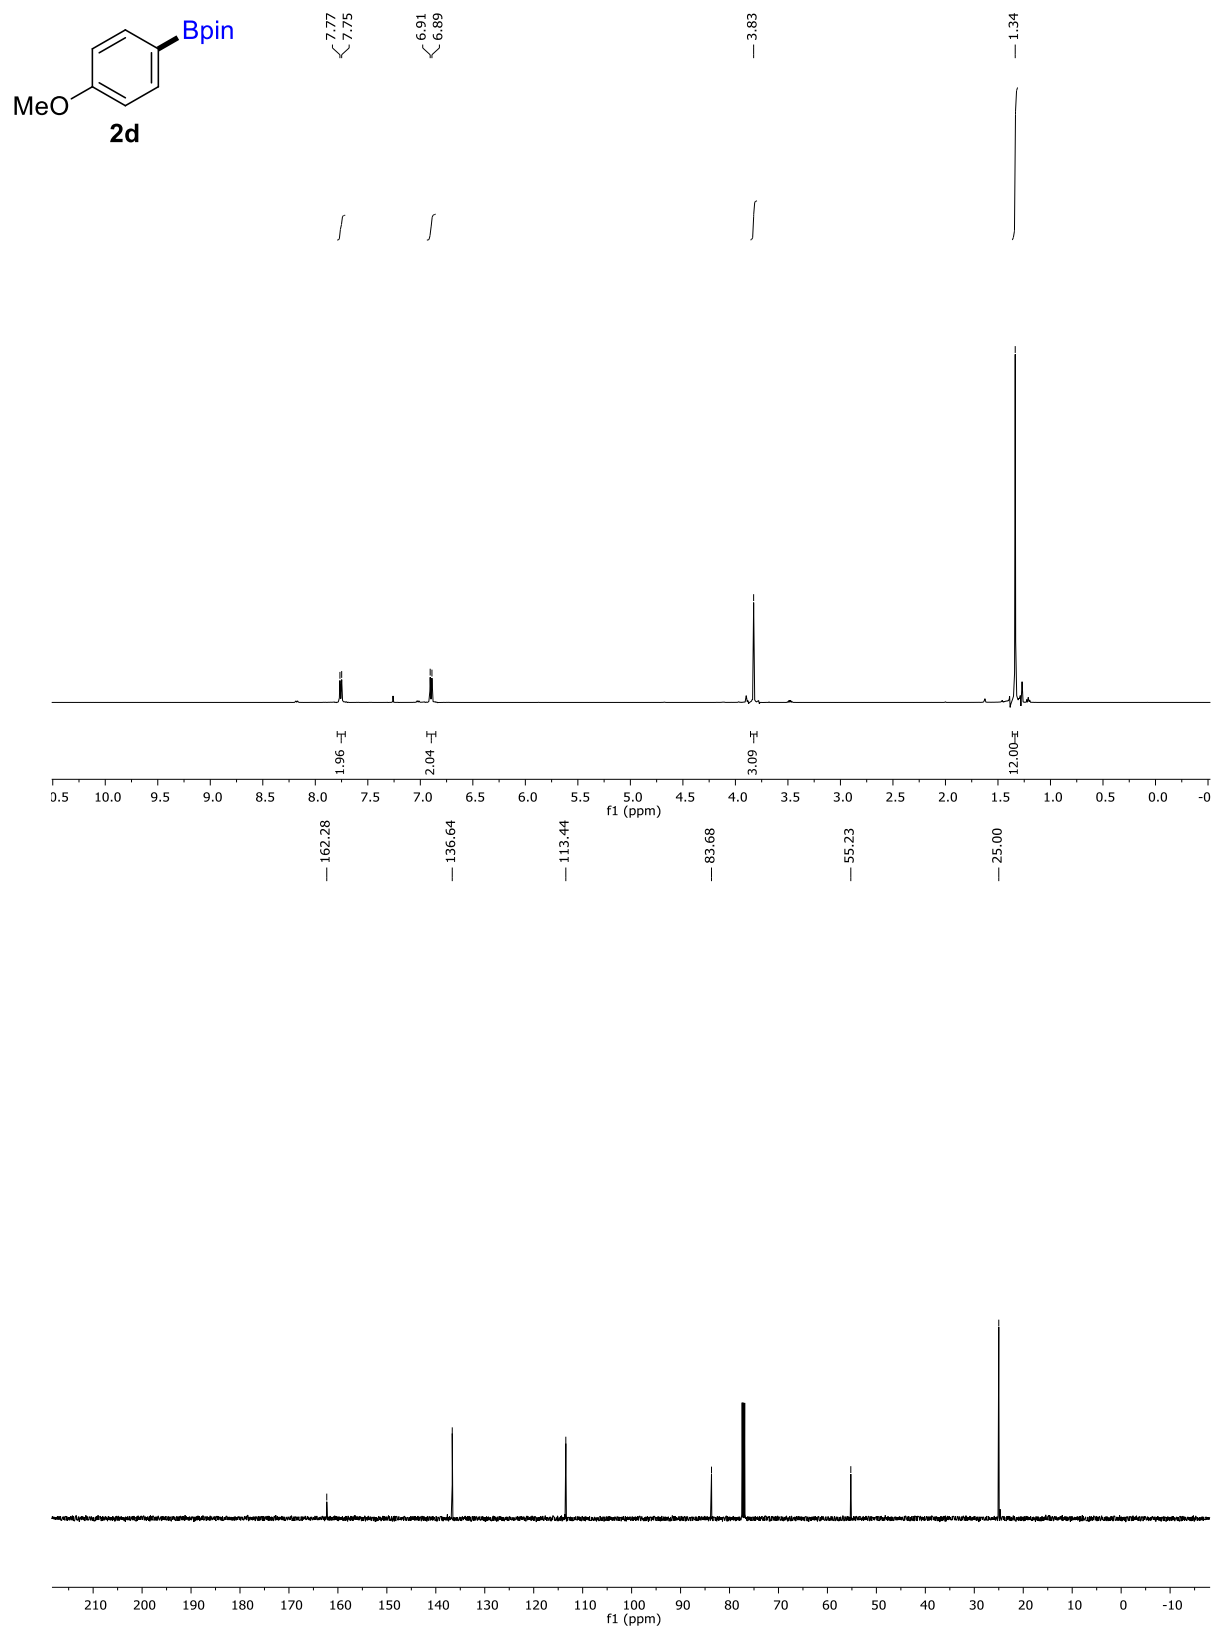**Figure S5.**  $^1\text{H}$  NMR and  $^{13}\text{C}$  NMR Spectra of **2d**.

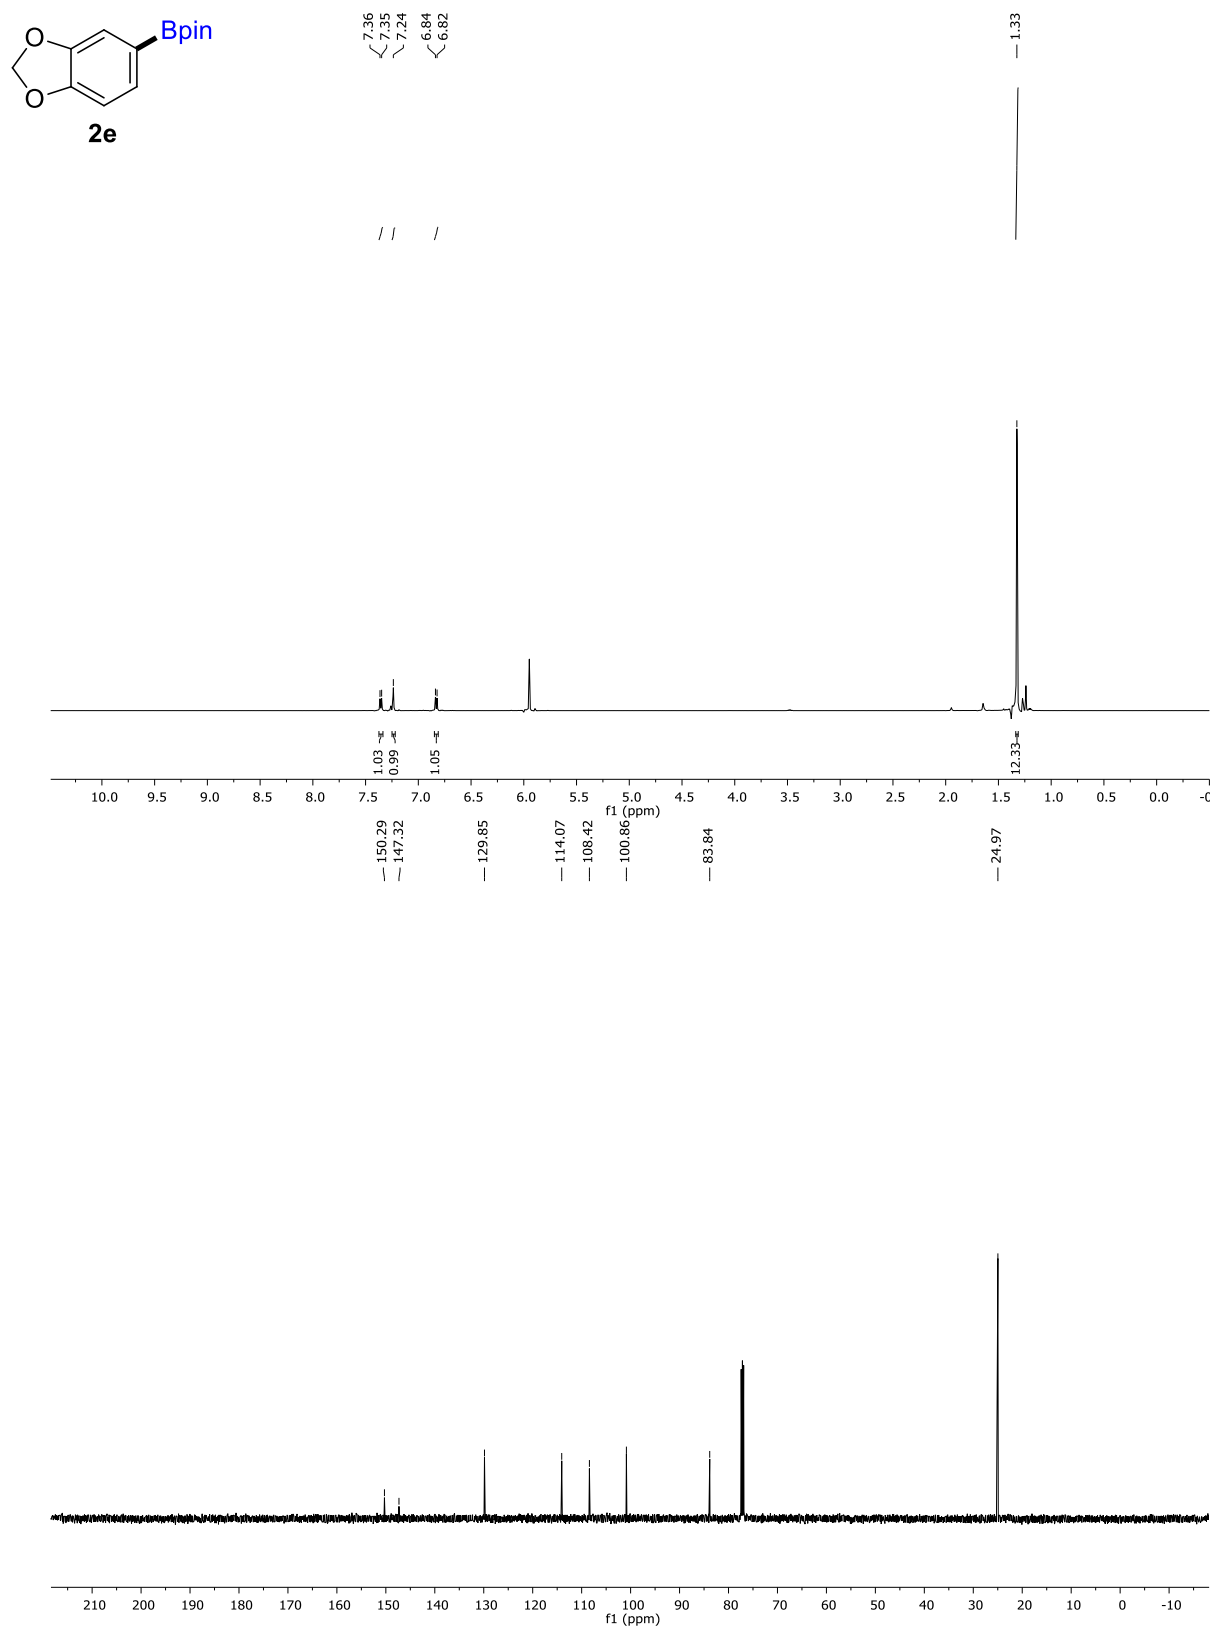

**Figure S6.**  $^1\text{H}$  NMR and  $^{13}\text{C}$  NMR Spectra of **2e**.

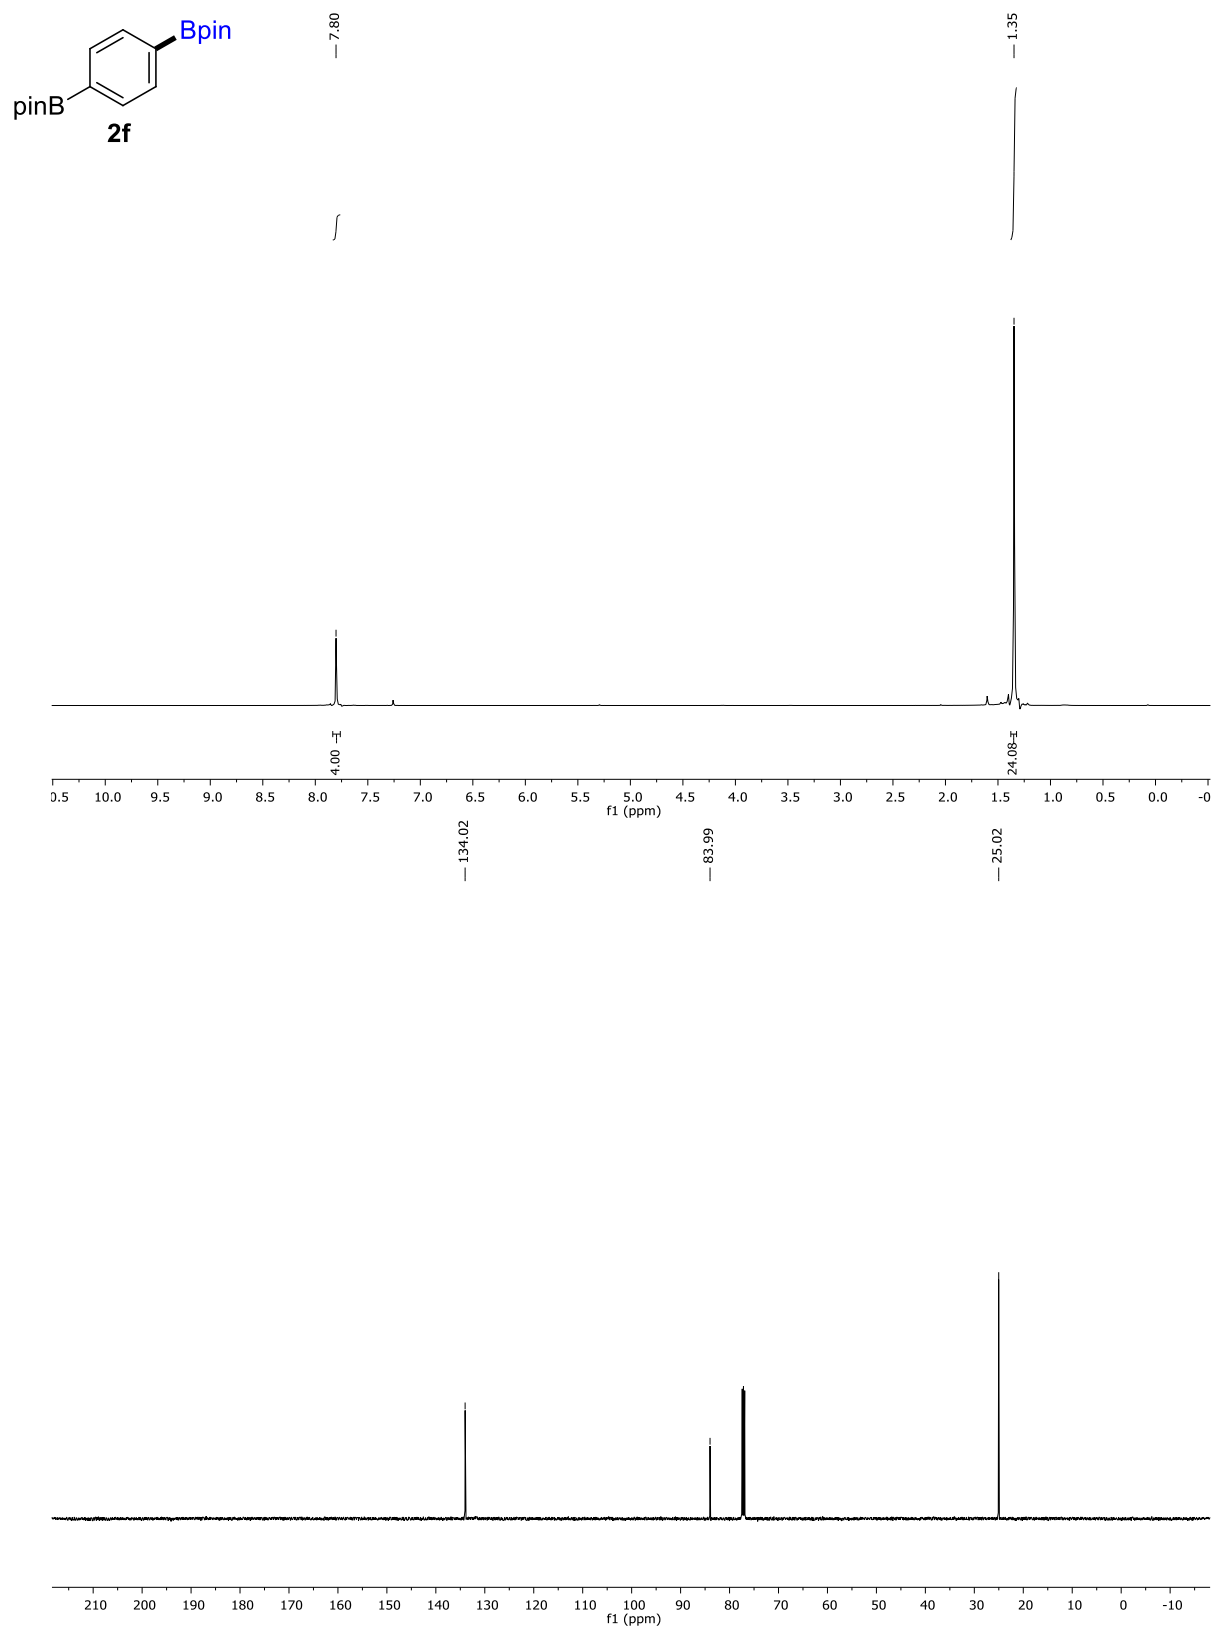**Figure S7.**  $^1\text{H}$  NMR and  $^{13}\text{C}$  NMR Spectra of **2f**.



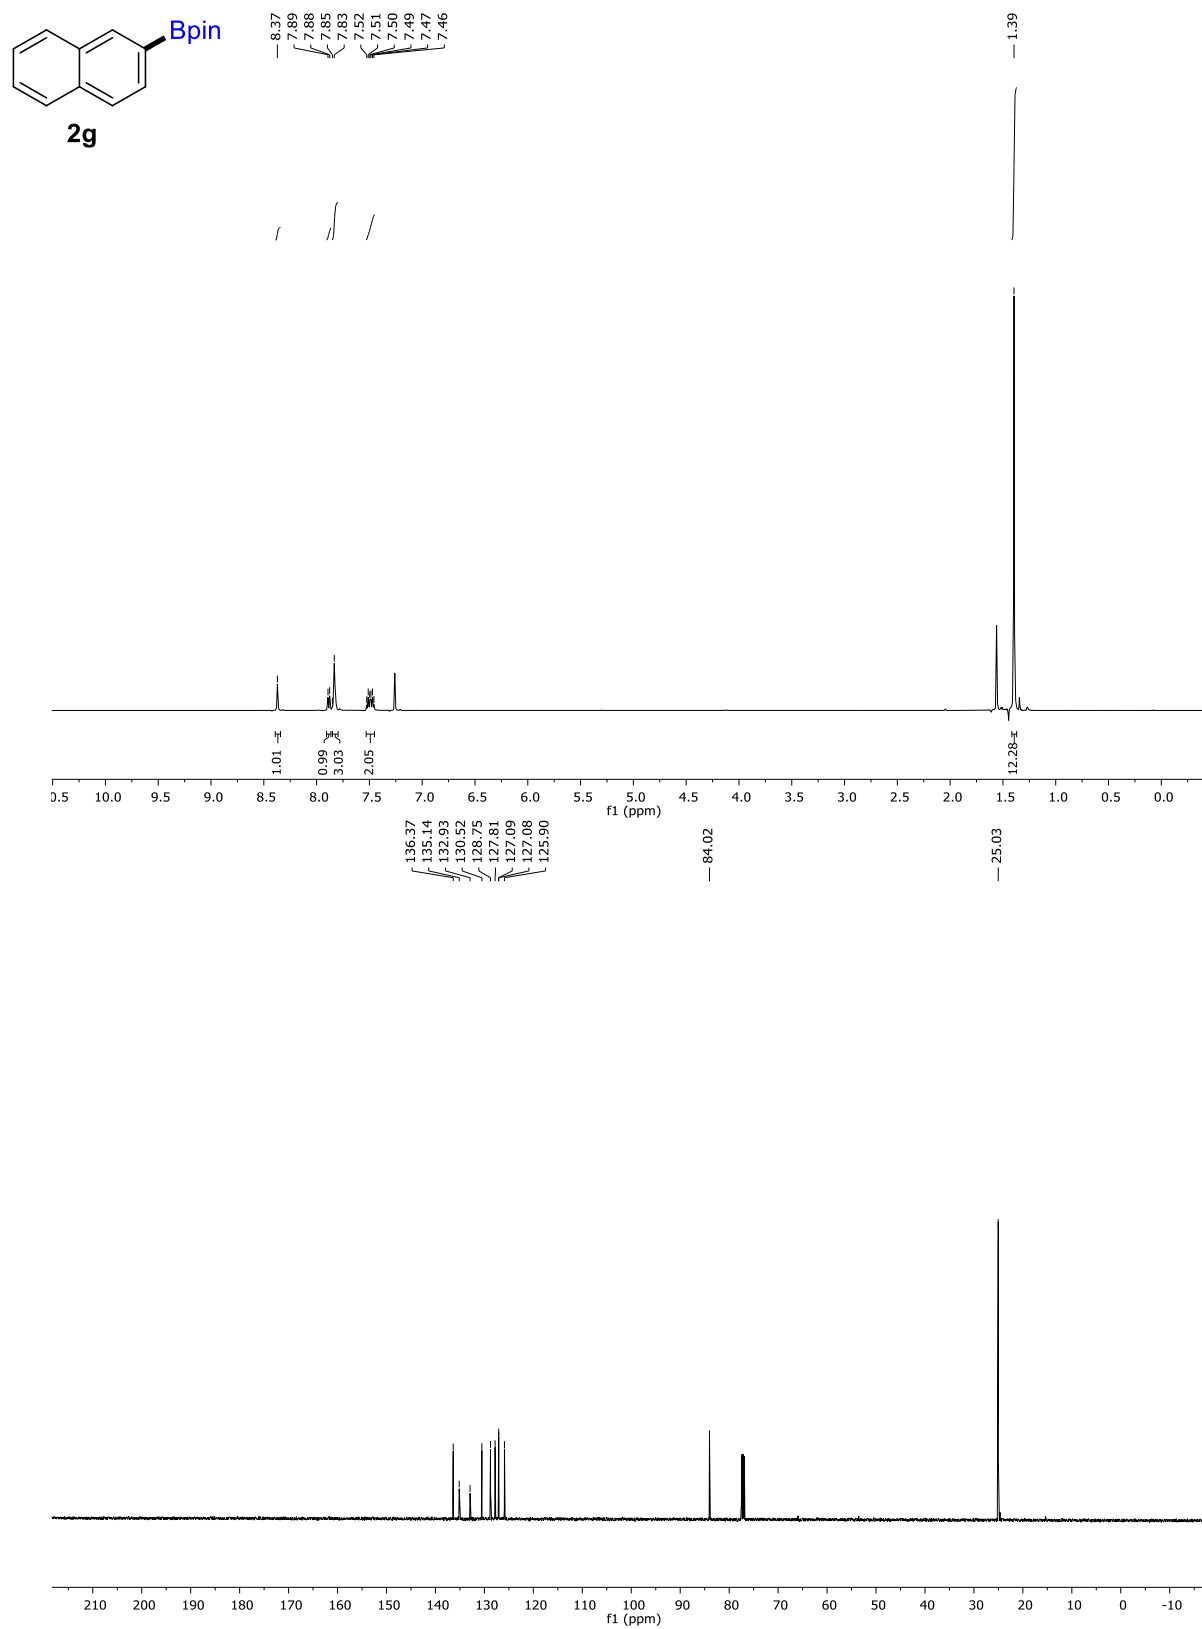**Figure S8.**  $^1\text{H}$  NMR and  $^{13}\text{C}$  NMR Spectra of **2g**.

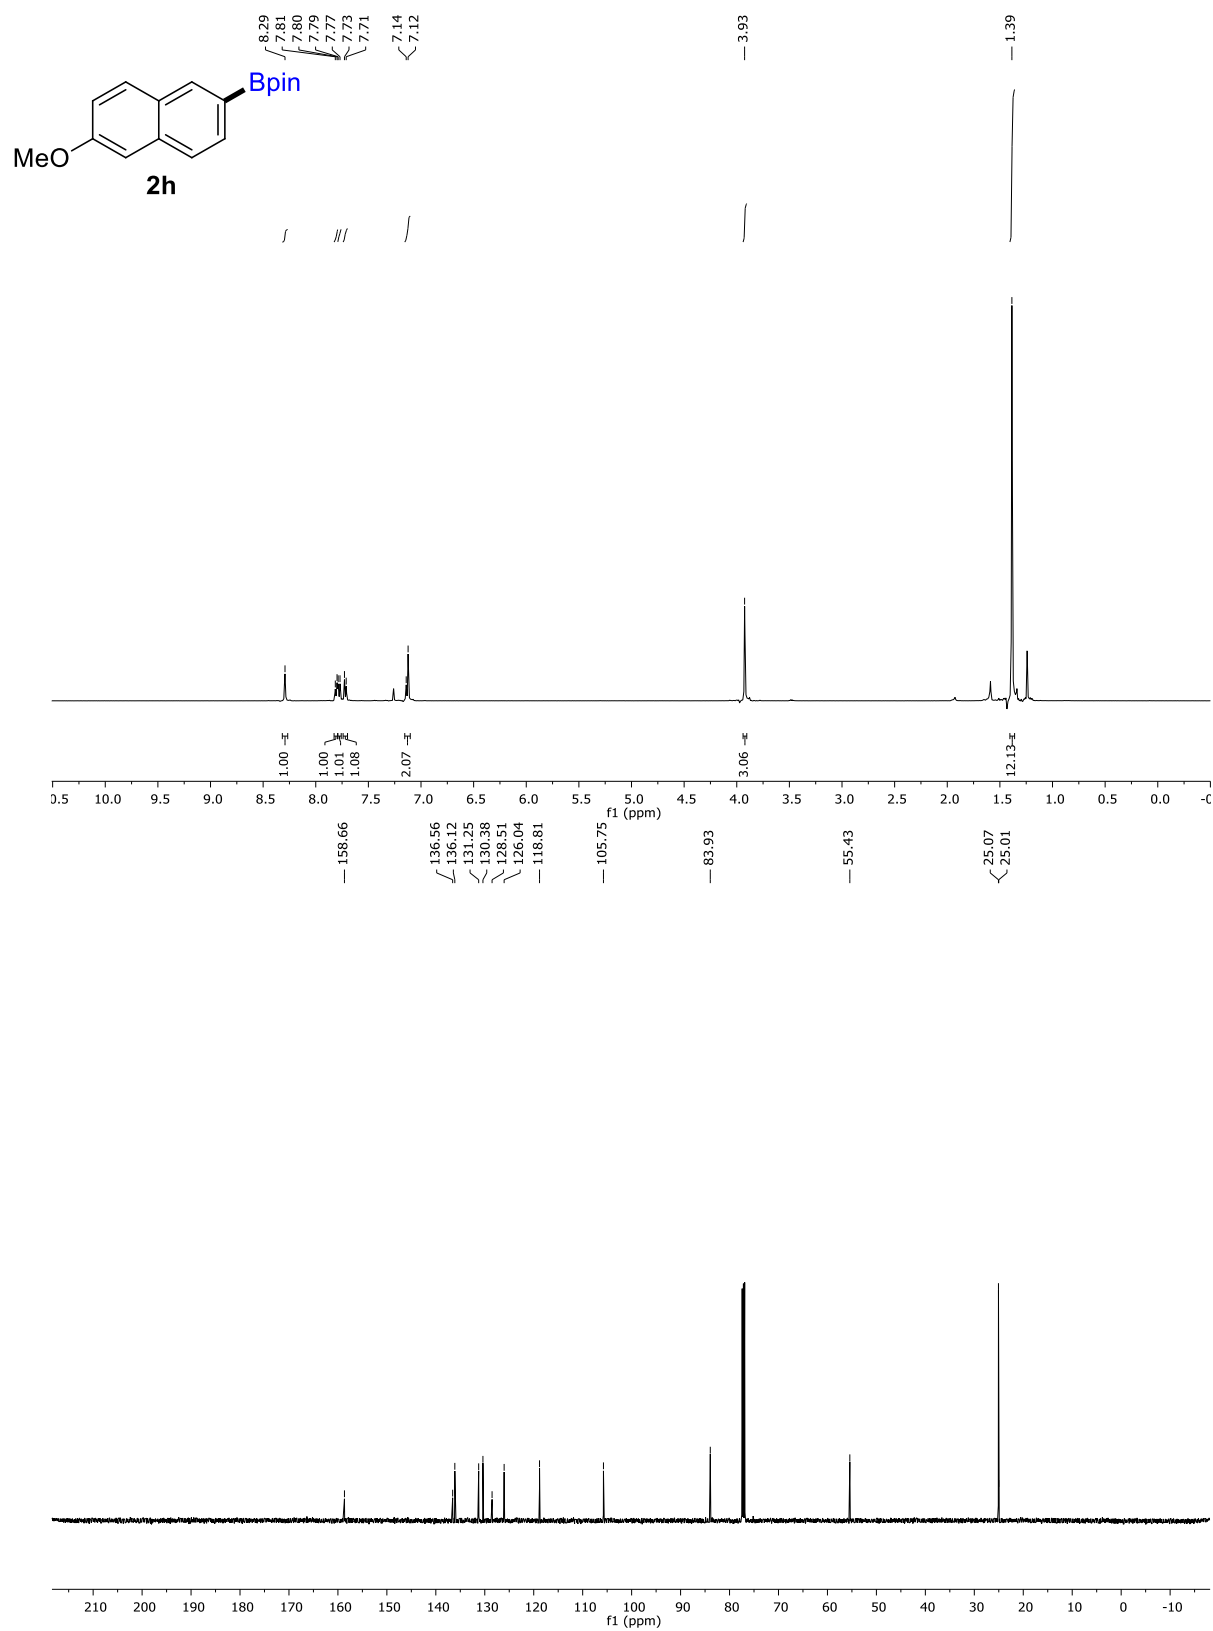**Figure S9.**  $^1\text{H}$  NMR and  $^{13}\text{C}$  NMR Spectra of **2h**.

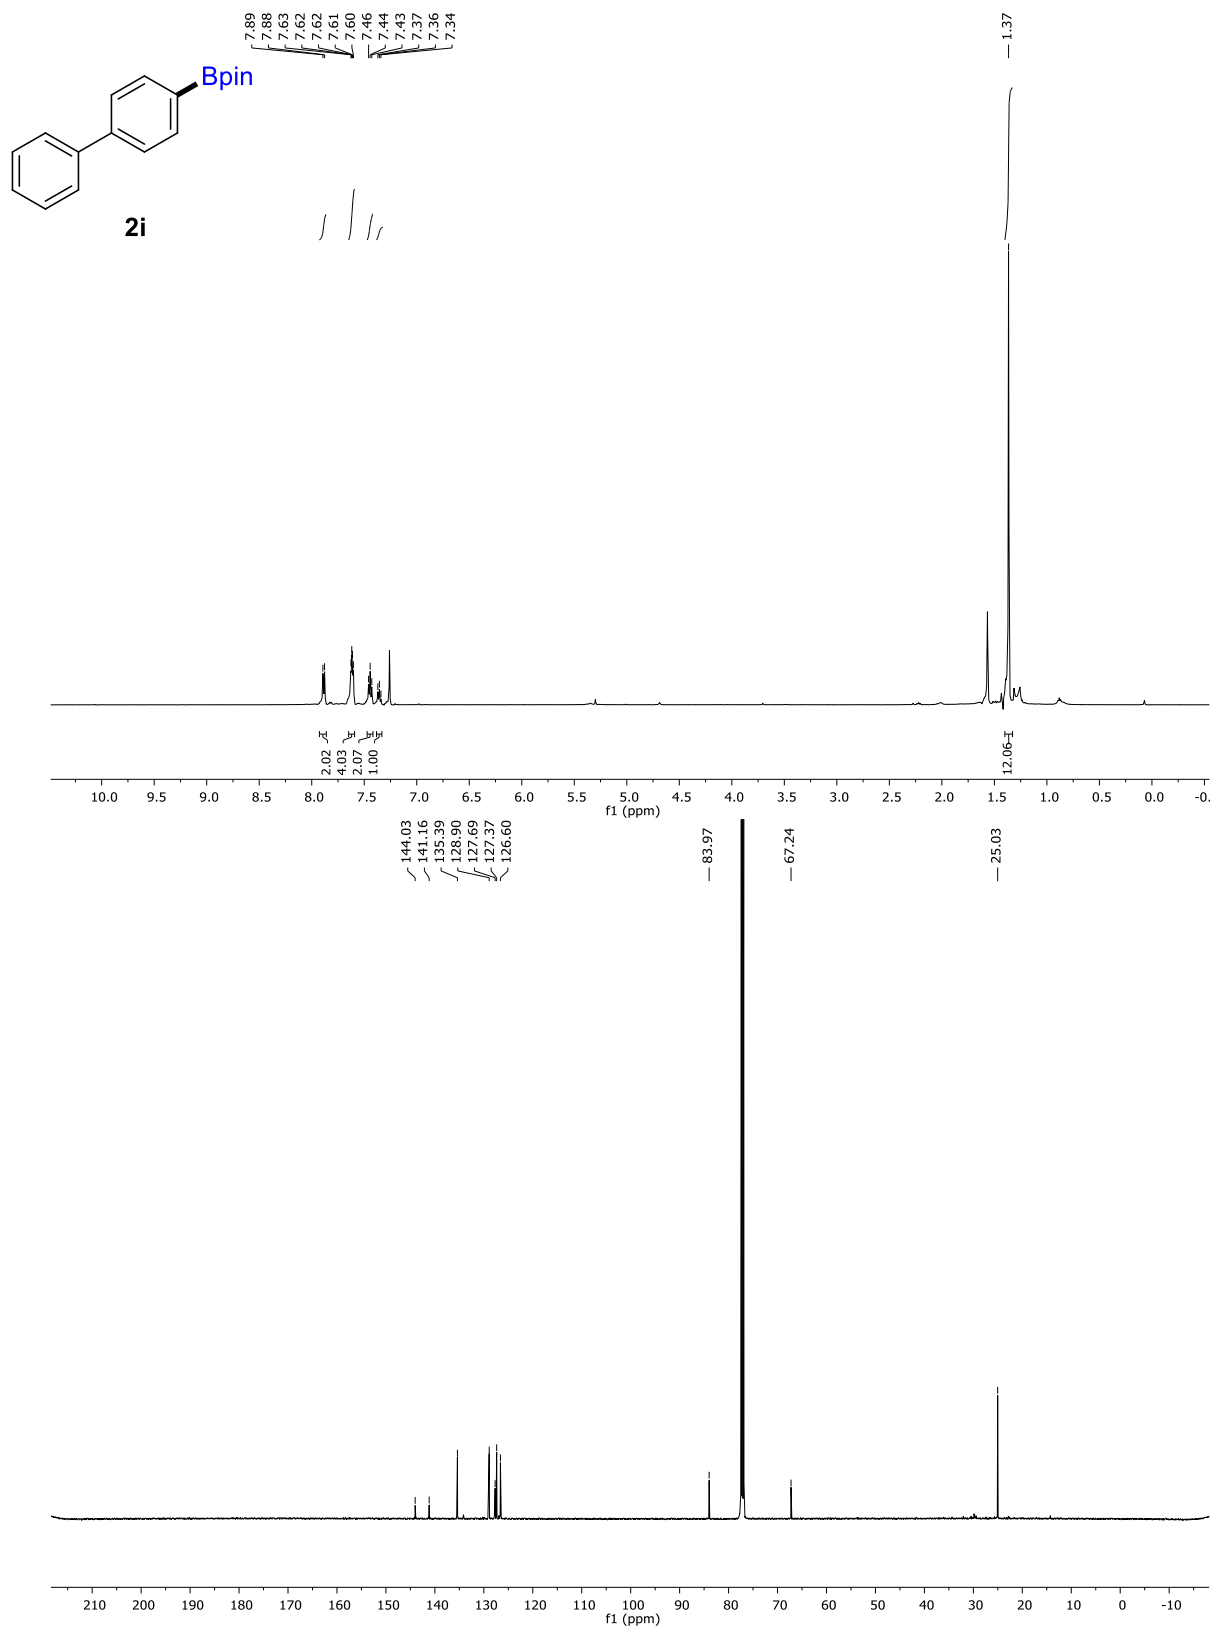

Figure S10.  $^1\text{H}$  NMR and  $^{13}\text{C}$  NMR Spectra of **2i**.

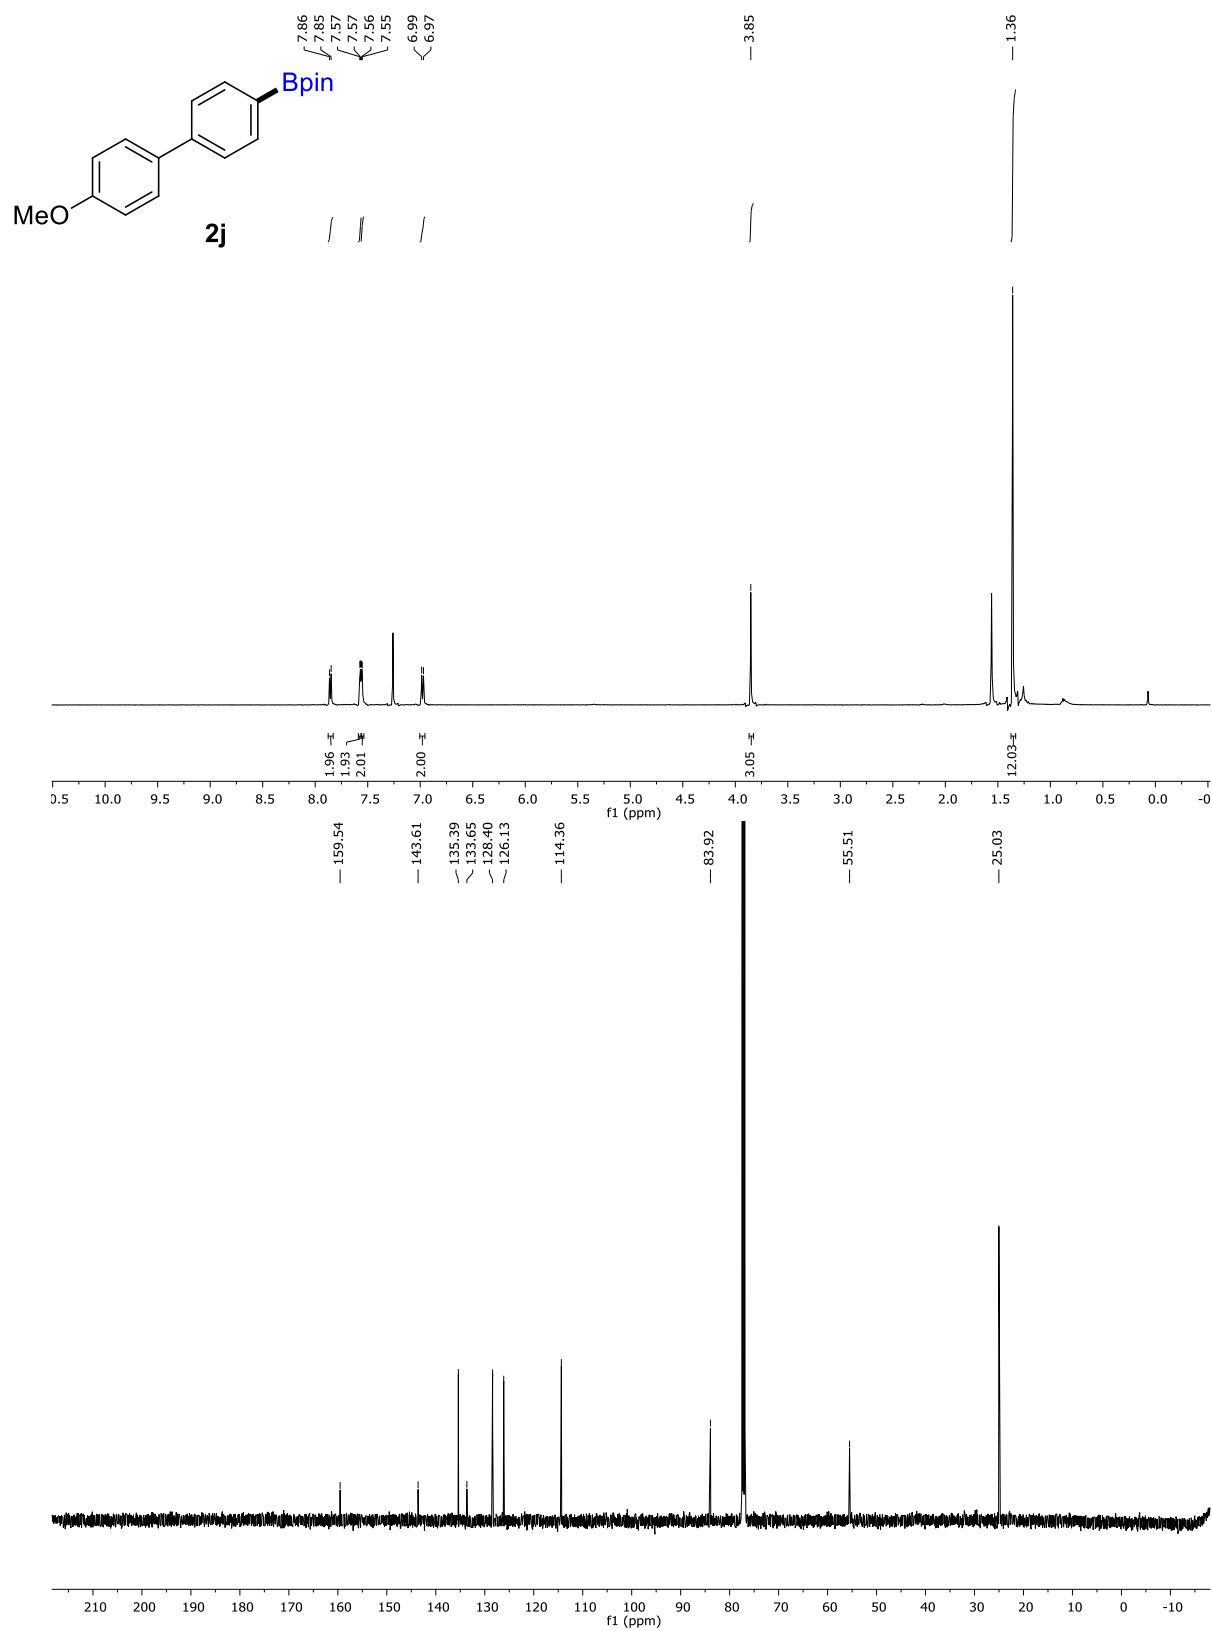Figure S11.  $^1\text{H}$  NMR and  $^{13}\text{C}$  NMR Spectra of **2j**.
